# Supplementary material for: Tumor Copy Number Alteration Burden as a Predictor for Resistance to Immune Checkpoint Blockade across Different Cancer Types
Source: MDPI journal article supplement (doi:10.3390/cancers16040732), 2024-02-09
Supplement: s1 [file s1]

Supplementary Figure S1

A.

LowCNA HighCNA

All patients

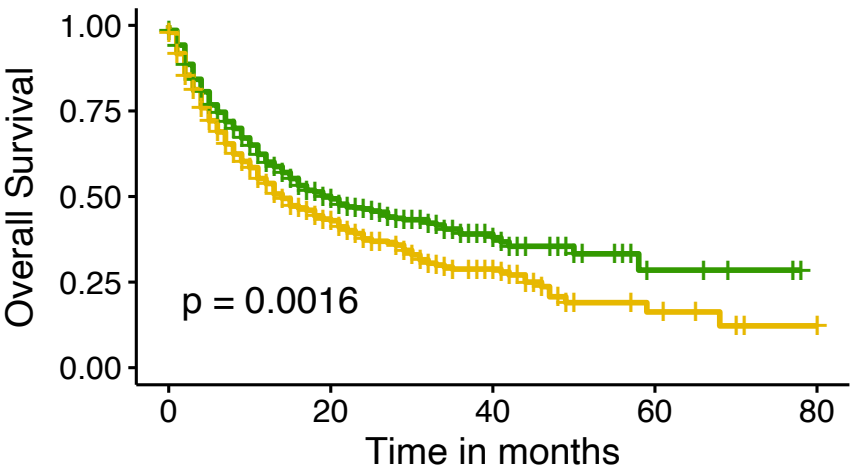

Number at risk

|     |     |    |   |   |
|-----|-----|----|---|---|
| 541 | 196 | 36 | 5 | 0 |
| 546 | 177 | 36 | 6 | 1 |

B.

Melanoma cohort

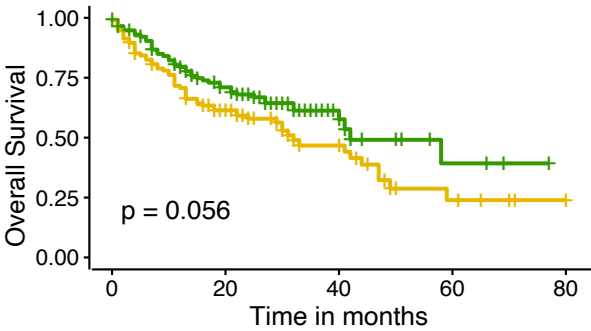

Number at risk

|     |    |    |   |   |
|-----|----|----|---|---|
| 116 | 72 | 17 | 4 | 0 |
| 115 | 59 | 19 | 5 | 1 |

C.

Bladder Cancer cohort

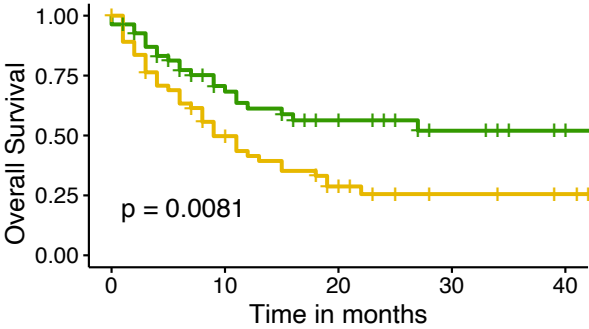

Number at risk

|    |    |    |   |   |
|----|----|----|---|---|
| 55 | 30 | 18 | 8 | 2 |
| 56 | 25 | 12 | 5 | 3 |

D.

NSCLC cohort

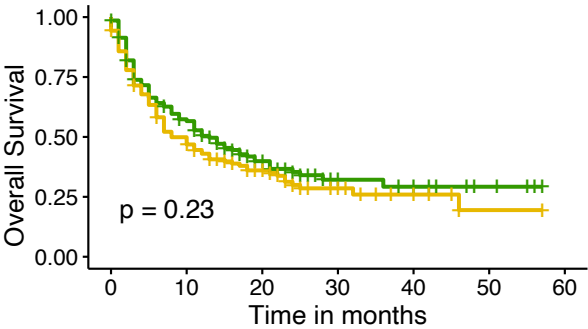

Number at risk

|     |    |    |    |   |   |   |
|-----|----|----|----|---|---|---|
| 141 | 75 | 39 | 12 | 9 | 4 | 0 |
| 141 | 66 | 35 | 14 | 7 | 2 | 0 |

E.

Colorectal Cancer cohort

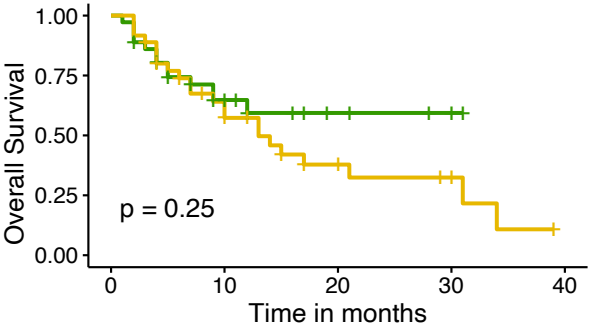

Number at risk

|    |    |   |   |   |
|----|----|---|---|---|
| 36 | 16 | 6 | 4 | 0 |
| 36 | 19 | 8 | 4 | 0 |
