# Supplementary material for: Tumor Copy Number Alteration Burden as a Predictor for Resistance to Immune Checkpoint Blockade across Different Cancer Types
Source: MDPI journal article supplement (doi:10.3390/cancers16040732), 2024-02-09
Supplement: s1 [file s1]

**Supplementary Table S2.** Distribution of the four subgroups stratified according to the combinatorial expression of TMB and CNA burden across the different cancer types.

| <b>Cancer Type</b>         | <b>Frequency</b> | <b>TMB/CNA subgroup</b> |
|----------------------------|------------------|-------------------------|
| Melanoma                   | 63               | LowTMB/LowCNA           |
| Melanoma                   | 54               | LowTMB/HighCNA          |
| Melanoma                   | 53               | HighTMB/LowCNA          |
| Melanoma                   | 61               | HighTMB/HighCNA         |
| Bladder Cancer             | 33               | LowTMB/LowCNA           |
| Bladder Cancer             | 28               | LowTMB/HighCNA          |
| Bladder Cancer             | 22               | HighTMB/LowCNA          |
| Bladder Cancer             | 28               | HighTMB/HighCNA         |
| Breast Cancer              | 16               | LowTMB/LowCNA           |
| Breast Cancer              | 17               | LowTMB/HighCNA          |
| Breast Cancer              | 1                | HighTMB/LowCNA          |
| Breast Cancer              | 1                | HighTMB/HighCNA         |
| Colorectal Cancer          | 17               | LowTMB/LowCNA           |
| Colorectal Cancer          | 26               | LowTMB/HighCNA          |
| Colorectal Cancer          | 19               | HighTMB/LowCNA          |
| Colorectal Cancer          | 10               | HighTMB/HighCNA         |
| Esophagogastric Cancer     | 22               | LowTMB/LowCNA           |
| Esophagogastric Cancer     | 27               | LowTMB/HighCNA          |
| Esophagogastric Cancer     | 8                | HighTMB/LowCNA          |
| Esophagogastric Cancer     | 4                | HighTMB/HighCNA         |
| Glioma                     | 42               | LowTMB/LowCNA           |
| Glioma                     | 40               | LowTMB/HighCNA          |
| Glioma                     | 2                | HighTMB/LowCNA          |
| Glioma                     | 5                | HighTMB/HighCNA         |
| Head and Neck Cancer       | 31               | LowTMB/LowCNA           |
| Head and Neck Cancer       | 29               | LowTMB/HighCNA          |
| Head and Neck Cancer       | 6                | HighTMB/LowCNA          |
| Head and Neck Cancer       | 9                | HighTMB/HighCNA         |
| Non-Small Cell Lung Cancer | 100              | LowTMB/LowCNA           |
| Non-Small Cell Lung Cancer | 83               | LowTMB/HighCNA          |
| Non-Small Cell Lung Cancer | 41               | HighTMB/LowCNA          |
| Non-Small Cell Lung Cancer | 58               | HighTMB/HighCNA         |
| Renal Cell Carcinoma       | 62               | LowTMB/LowCNA           |
| Renal Cell Carcinoma       | 65               | LowTMB/HighCNA          |
| Renal Cell Carcinoma       | 3                | HighTMB/LowCNA          |
| Renal Cell Carcinoma       | 1                | HighTMB/HighCNA         |
