# Supplementary material for: Tumor Copy Number Alteration Burden as a Predictor for Resistance to Immune Checkpoint Blockade across Different Cancer Types
Source: MDPI journal article supplement (doi:10.3390/cancers16040732), 2024-02-09
Supplement: s1 [file s1]

**Supplementary Table S3. Characteristics of the four ‘TMB/CNA’ subgroups identified in the MSK-IMPACT translational study cohort.**

|                         | <b>LowTMB/<br/>LowCNA<br/>(n=386)</b> | <b>LowTMB/<br/>HighCNA<br/>(n=369)</b> | <b>HighTMB/<br/>LowCNA<br/>(n=155)</b> | <b>HighTMB/<br/>HighCNA<br/>(n=177)</b> | <b>P-value</b> |
|-------------------------|---------------------------------------|----------------------------------------|----------------------------------------|-----------------------------------------|----------------|
| <b>Sample type</b>      |                                       |                                        |                                        |                                         |                |
| Primary                 | 193 (50%)                             | 186 (50.4%)                            | 63 (40.6%)                             | 59 (33.3%)                              | <0.001         |
| Metastasis              | 193 (50%)                             | 183 (49.6%)                            | 92 (59.4%)                             | 118 (66.7%)                             |                |
| <b>Drug class</b>       |                                       |                                        |                                        |                                         |                |
| Anti PD-1/PD-L1         | 289 (75%)                             | 288 (78%)                              | 111 (71.6%)                            | 129 (73%)                               | 0.36           |
| Anti CTLA-4             | 28 (7.2%)                             | 24 (6.5%)                              | 19 (12.3%)                             | 16 (9%)                                 |                |
| Combination             | 69 (17.8%)                            | 57 (15.5%)                             | 25 (16.1%)                             | 31 (17.5%)                              |                |
| <b>Sex</b>              |                                       |                                        |                                        |                                         |                |
| Male                    | 228 (59%)                             | 227 (61.5%)                            | 97 (62.6%)                             | 111 (62.7%)                             | 0.78           |
| Female                  | 158 (41%)                             | 142 (38.4%)                            | 58 (37.4%)                             | 66 (37.3%)                              |                |
| <b>Age group</b>        |                                       |                                        |                                        |                                         |                |
| ≤30                     | 18 (4.7%)                             | 10 (2.7%)                              | 2 (1.3%)                               | 3 (1.7%)                                | <0.01          |
| 31-50                   | 83 (21.5%)                            | 74 (20%)                               | 16 (10.3%)                             | 24 (13.6%)                              |                |
| 50-60                   | 100 (25.9%)                           | 98 (26.6%)                             | 38 (24.5%)                             | 42 (23.7%)                              |                |
| 61-70                   | 103 (26.7%)                           | 111 (30.1%)                            | 46 (29.7%)                             | 63 (35.6%)                              |                |
| ≥71                     | 82 (21.2%)                            | 76 (21.6%)                             | 53 (34.2%)                             | 45 (25.4%)                              |                |
| <b>Smoking history</b>  |                                       |                                        |                                        |                                         |                |
| Previous/Current smoker | 153 (39.6%)                           | 147 (39.8%)                            | 60 (38.7%)                             | 75 (42.4%)                              | 0.82           |
| Never                   | 162 (42%)                             | 156 (42.3%)                            | 71 (45.8%)                             | 66 (37.3%)                              |                |
| Unknown                 | 71 (18.4%)                            | 66 (17.9%)                             | 24 (15.5%)                             | 36 (20.3%)                              |                |

Abbreviations: TMB, tumor mutational burden; CNA, copy number alterations burden.
