# Supplementary figures and images for: Tumor Copy Number Alteration Burden as a Predictor for Resistance to Immune Checkpoint Blockade across Different Cancer Types
Source: MDPI journal article supplement (doi:10.3390/cancers16040732), 2024-02-09

### Supplementary Figure S3

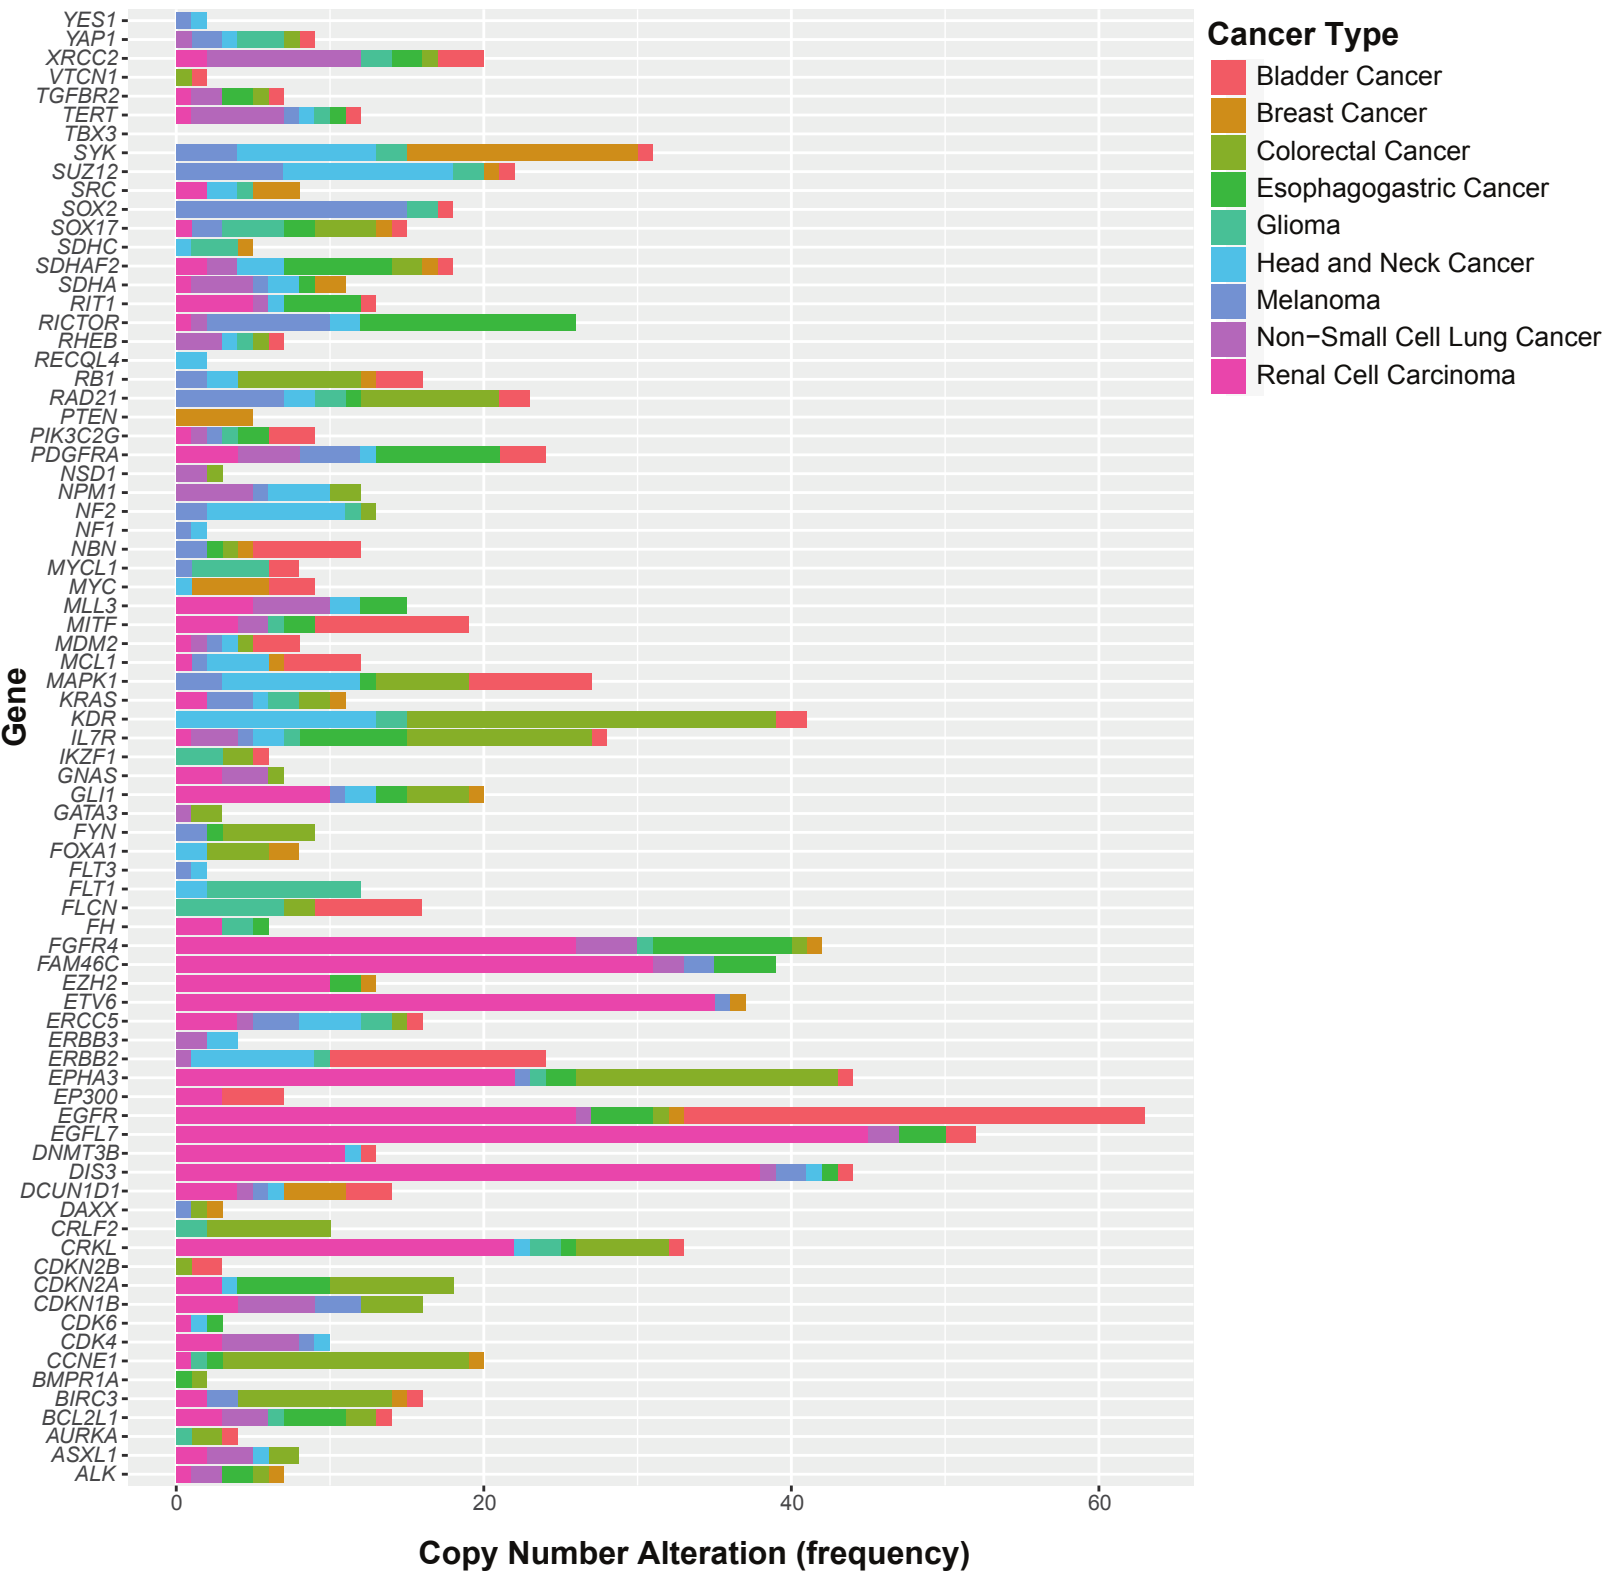

Supplement: s1 [file s1]

Supplementary Figure S4

A.

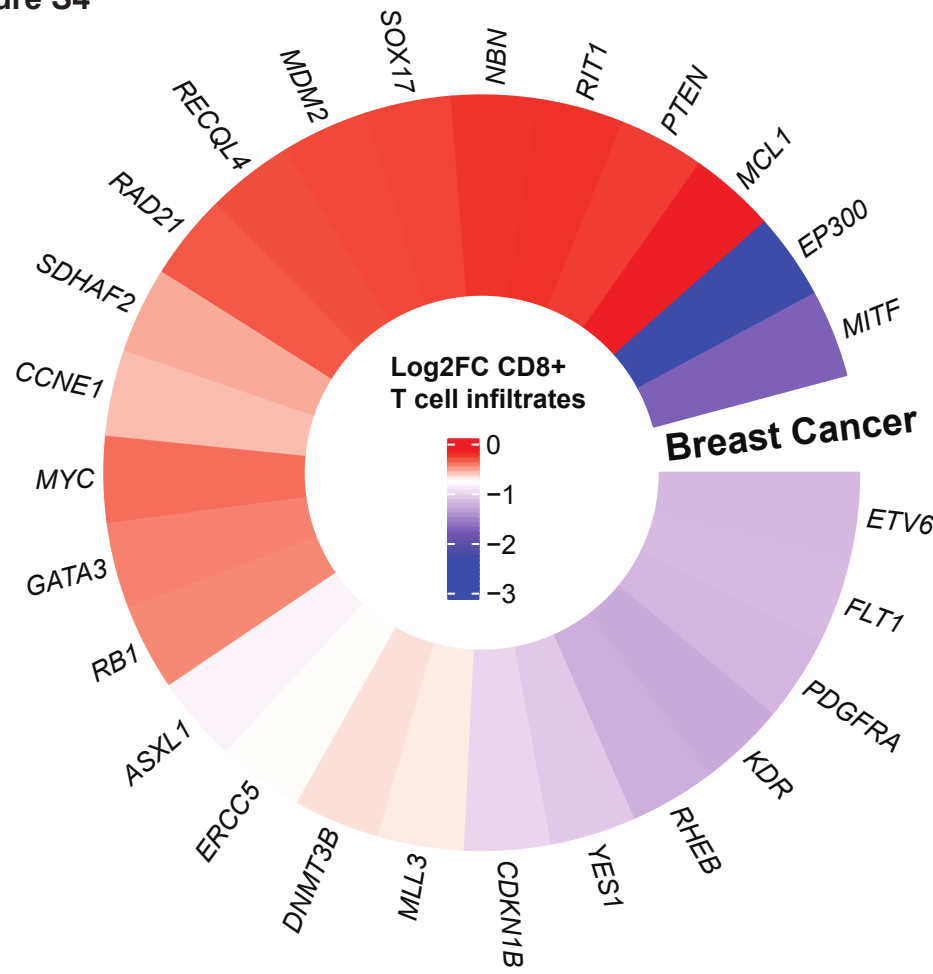

B.

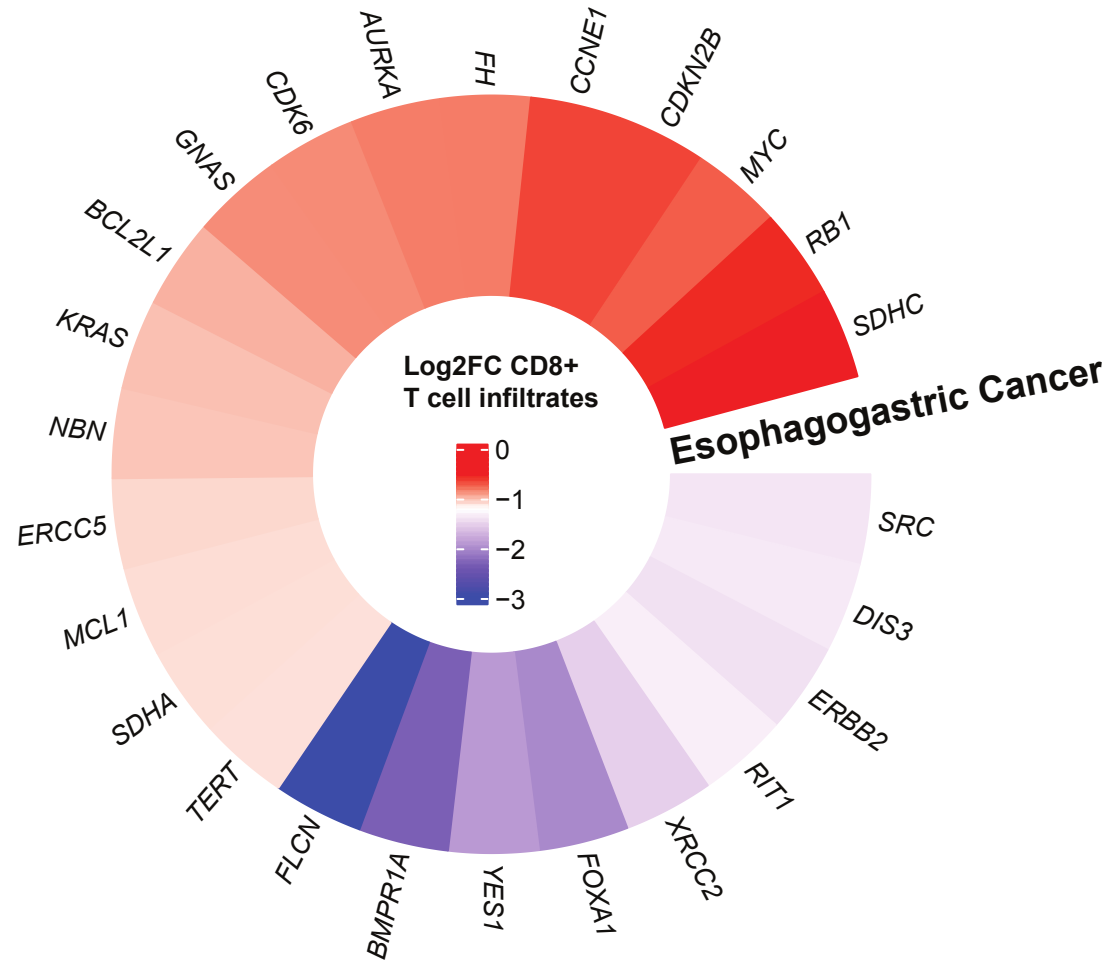

Supplement: s1 [file s1]

Supplementary Figure S2

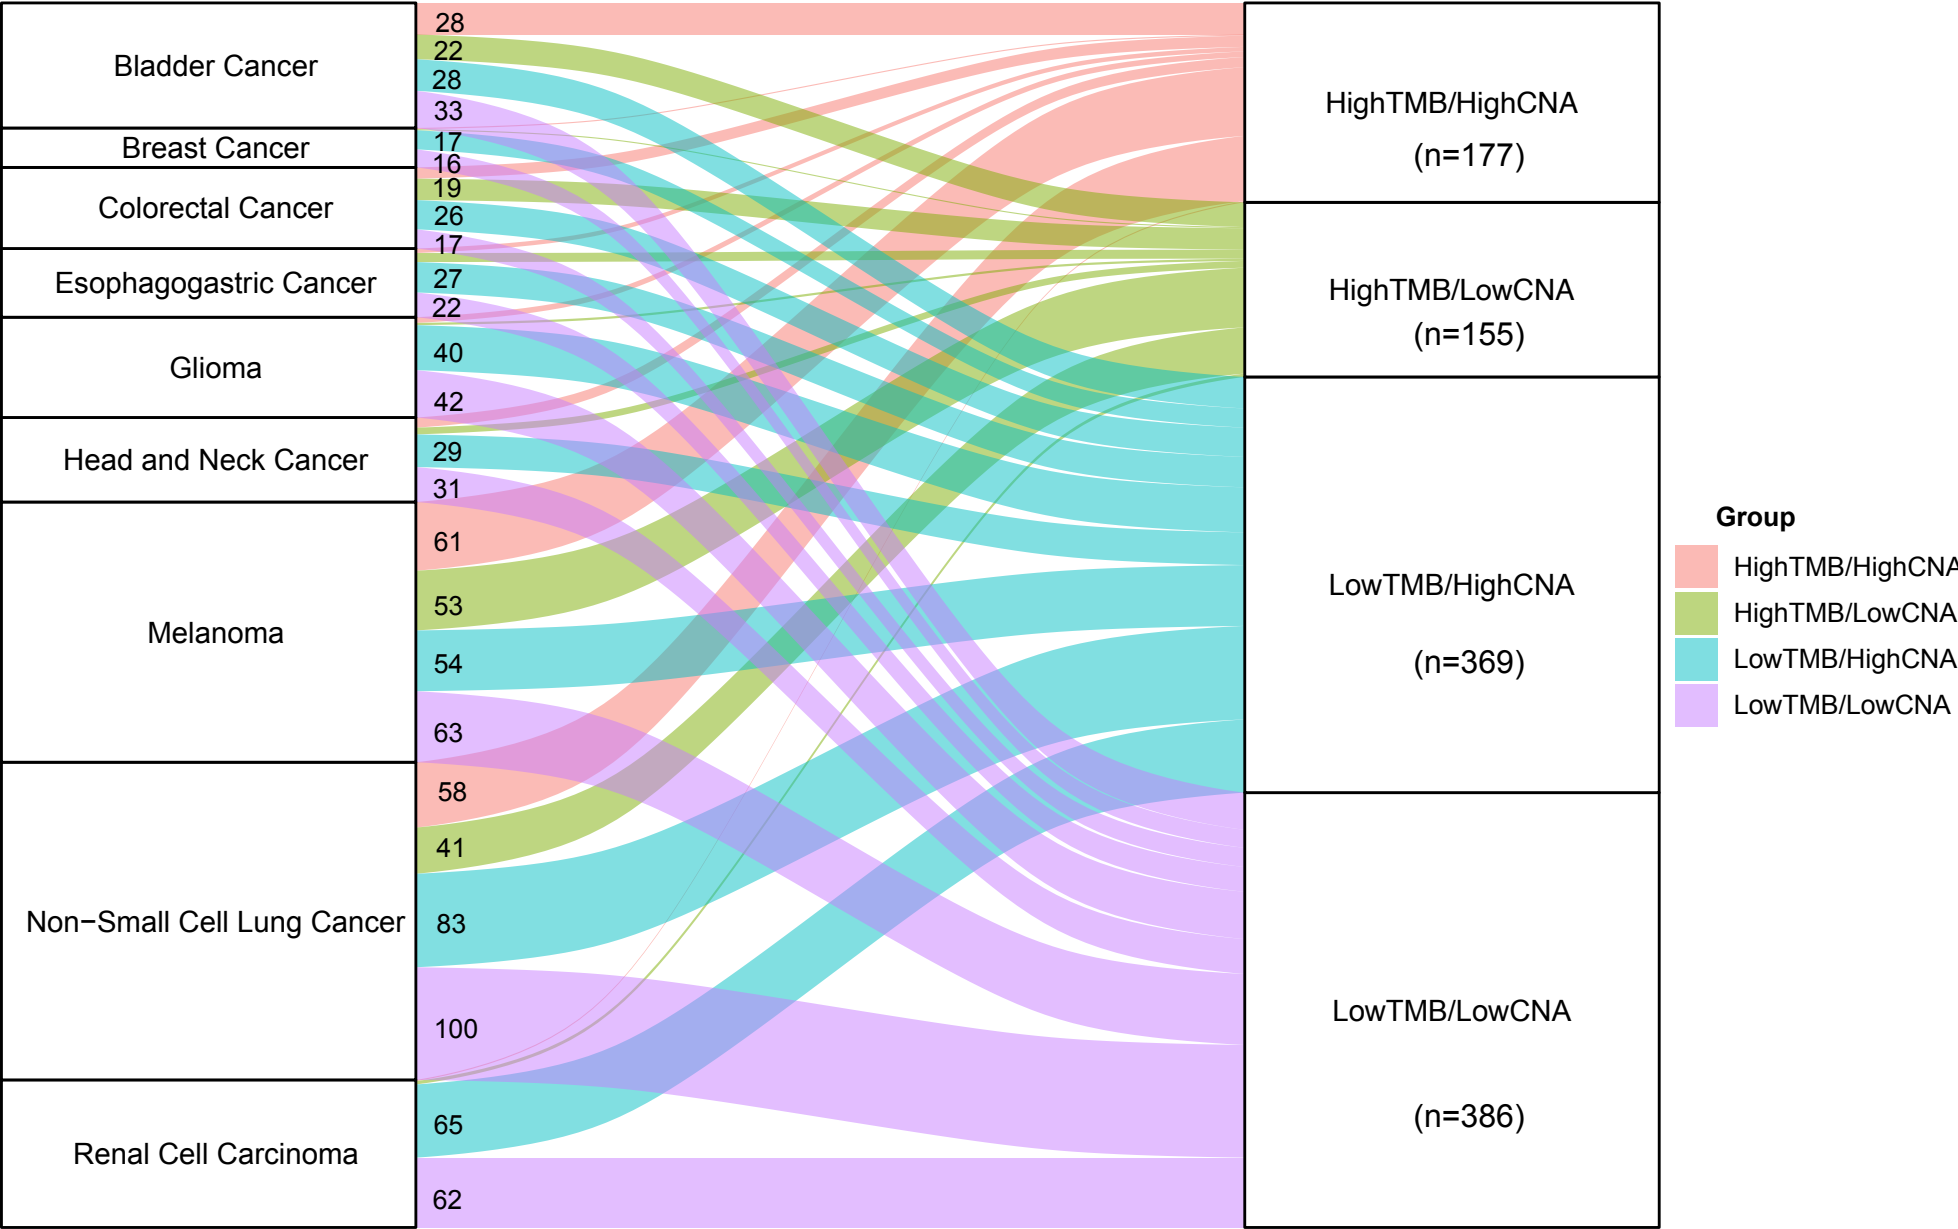

Supplement: s1 [file s1]
